# Supplementary material for: Targeting Akt/NF-κB/p53 Pathway and Apoptosis Inducing Potential of 1,2-Benzenedicarboxylic Acid, Bis (2-Methyl Propyl) Ester Isolated from Onosma bracteata Wall. against Human Osteosarcoma (MG-63) Cells
Source: MDPI journal article supplement (doi:10.3390/molecules27113478), 2022-05-28
Supplement: s1 [file s1]

Supplementary Table S1. Antioxidant activity of extract/fractions of *O. bracteata* in Superoxide anion radical scavenging assay.

| Conc<br>(µg/ml)          | Scavenging (%)           |                           |                           |                           |                           |                           |
|--------------------------|--------------------------|---------------------------|---------------------------|---------------------------|---------------------------|---------------------------|
|                          | Rutin                    | Obhex                     | Obcl                      | Obea                      | Obbu                      | Obaq                      |
| 25                       | 39.36± 2.60 <sup>c</sup> | 16.85 ± 2.18 <sup>d</sup> | 18.33 ± 1.21 <sup>d</sup> | 13.77 ± 2.99 <sup>d</sup> | 14.76 ± 3.18 <sup>d</sup> | 15.62 ± 1.51 <sup>d</sup> |
| 50                       | 43.91± 2.93 <sup>c</sup> | 30.87 ± 1.79 <sup>c</sup> | 31.61 ± 2.23 <sup>c</sup> | 30.01 ± 3.39 <sup>c</sup> | 22.88 ± 2.10 <sup>d</sup> | 19.43 ± 2.28 <sup>d</sup> |
| 100                      | 74.29± 1.09 <sup>b</sup> | 50.80 ± 1.57 <sup>b</sup> | 52.40 ± 1.82 <sup>b</sup> | 57.81± 1.81 <sup>b</sup>  | 41.21 ± 1.25 <sup>c</sup> | 29.64 ± 1.66 <sup>c</sup> |
| 200                      | 77.74± 1.45 <sup>b</sup> | 59.78 ± 1.69 <sup>a</sup> | 62.85 ± 1.98 <sup>a</sup> | 69.61± 3.09 <sup>b</sup>  | 57.32 ± 0.68 <sup>b</sup> | 39.11 ± 2.06 <sup>b</sup> |
| 400                      | 90.16± 1.07 <sup>a</sup> | 66.05 ± 0.56 <sup>a</sup> | 71.71 ± 3.25 <sup>a</sup> | 85.36 ± 2.60 <sup>a</sup> | 66.67 ± 1.09 <sup>a</sup> | 59.04 ± 0.56 <sup>a</sup> |
| EC <sub>50</sub> (µg/ml) | 46.18                    | 132.23                    | 114.30                    | 95.12                     | 160.47                    | 310.91                    |
| Regression equation      | y = 19.53ln(x) - 24.88   | y = 18.37ln(x) - 39.71    | y = 19.91ln(x) - 44.31    | y = 26.37ln(x) - 70.12    | y = 19.94ln(x) - 51.28    | y = 15.36ln(x) - 38.19    |
| r                        | 0.961                    | 0.980                     | 0.988                     | 0.991                     | 0.992                     | 0.967                     |
| F-ratio                  | 125.18*                  | 155.21*                   | 100.34*                   | 106.01*                   | 136.74*                   | 102.67*                   |
| HSD                      | 9.27                     | 7.68                      | 10.26                     | 13.19                     | 8.78                      | 8.00                      |

Significance level (\* $p \leq 0.05$ ).  
Values expressed as mean ± SE.  
Means with different superscripts alphabets represent significantly different values.  
*Obhex* (hexane fraction); *Obcl* (chloroform fraction); *Obea* (ethyl acetate fraction); *Obbu* (butanol fraction); *Obaq* (aqueous fraction)

Supplementary Table S2. Antioxidant activity of extract/fractions of *O. bracteata* in Lipid peroxidation assay.

| Conc<br>(µg/ml)          | Scavenging (%)            |                           |                           |                           |                           |                           |
|--------------------------|---------------------------|---------------------------|---------------------------|---------------------------|---------------------------|---------------------------|
|                          | Rutin                     | Obhex                     | Obcl                      | Obea                      | Obbu                      | Obaq                      |
| 25                       | 20.06 ± 1.36 <sup>c</sup> | 7.91 ± 1.14 <sup>e</sup>  | 11.38 ± 1.85 <sup>d</sup> | 16.50 ± 2.10 <sup>e</sup> | 9.79 ± 2.18 <sup>d</sup>  | 8.83 ± 1.75 <sup>e</sup>  |
| 50                       | 39.12 ± 1.76 <sup>d</sup> | 19.33 ± 2.23 <sup>d</sup> | 19.33 ± 2.68 <sup>d</sup> | 31.74 ± 2.78 <sup>d</sup> | 16.28 ± 1.06 <sup>d</sup> | 16.92 ± 0.99 <sup>d</sup> |
| 100                      | 59.28 ± 3.48 <sup>c</sup> | 37.73 ± 4.22 <sup>c</sup> | 39.05 ± 3.91 <sup>c</sup> | 63.23 ± 2.80 <sup>c</sup> | 38.74 ± 1.69 <sup>c</sup> | 38.51 ± 1.62 <sup>c</sup> |
| 200                      | 75.09 ± 3.73 <sup>b</sup> | 69.68 ± 1.54 <sup>b</sup> | 68.73 ± 1.01 <sup>b</sup> | 77.32 ± 2.32 <sup>b</sup> | 58.55 ± 1.51 <sup>b</sup> | 58.96 ± 1.32 <sup>b</sup> |
| 400                      | 89.88 ± 0.83 <sup>a</sup> | 90.23 ± 0.44 <sup>a</sup> | 90.55 ± 2.50 <sup>a</sup> | 91.50 ± 1.04 <sup>a</sup> | 92.30 ± 1.19 <sup>a</sup> | 92.84 ± 0.95 <sup>a</sup> |
| EC <sub>50</sub> (µg/ml) | 76.77                     | 117.52                    | 114.31                    | 80.67                     | 125.79                    | 127.03                    |
| Regression equation      | y = 25.33ln(x) - 59.97    | y = 31.01ln(x) - 97.84    | y = 29.96ln(x) - 92.19    | y = 28.21ln(x) - 73.88    | y = 29.91ln(x) - 94.58    | y = 30.02ln(x) - 95.40    |
| r                        | 0.997                     | 0.987                     | 0.983                     | 0.988                     | 0.976                     | 0.975                     |
| F-ratio                  | 121.80*                   | 222.03*                   | 167.18*                   | 195.39*                   | 450.18*                   | 604.67*                   |
| HSD                      | 11.75                     | 10.76                     | 12.03                     | 10.43                     | 7.37                      | 6.38                      |

Significance level (\* $p \leq 0.05$ ).  
Values expressed as mean ± SE.  
Means with different superscripts alphabets represent significantly different values.  
*Obhex* (hexane fraction); *Obcl* (chloroform fraction); *Obea* (ethyl acetate fraction); *Obbu* (butanol fraction); *Obaq* (aqueous fraction)

Supplementary Table S3. Cytotoxic effects of BDCe fraction on A549, IMR-32 and MG-63 cancer cell line in MTT assay.

| Conc. (μM)                            | Percent Inhibition (BDCe fraction) |                                       |                                     |                                                  |
|---------------------------------------|------------------------------------|---------------------------------------|-------------------------------------|--------------------------------------------------|
|                                       | <i>A549 Lung cancer cell line</i>  | <i>IMR-32 neuroblastoma cell line</i> | <i>MG-63 osteosarcoma cell line</i> | <i>HL-7702 normal human hepatocyte cell line</i> |
| 15.625                                | 28.99 ± 2.09 <sup>d</sup>          | 22.52 ± 1.71 <sup>c</sup>             | 30.07 ± 1.21 <sup>d</sup>           | 4.06 ± 0.30 <sup>d</sup>                         |
| 31.25                                 | 38.40 ± 1.45 <sup>c</sup>          | 28.50 ± 1.87 <sup>c</sup>             | 42.27 ± 0.82 <sup>c</sup>           | 8.20 ± 0.68 <sup>c</sup>                         |
| 62.5                                  | 49.77 ± 1.11 <sup>b</sup>          | 51.58 ± 0.36 <sup>b</sup>             | 60.75 ± 1.14 <sup>b</sup>           | 18.63 ± 0.9 <sup>b</sup>                         |
| 125                                   | 76.71 ± 1.19 <sup>a</sup>          | 72.99 ± 0.90 <sup>a</sup>             | 82.23 ± 1.24 <sup>a</sup>           | 26.97 ± 0.60 <sup>a</sup>                        |
| Regression equation                   | y = 22.39ln(x) – 36.26             | 5.24ln(x) – 51.61                     | y = 25.03ln(x) – 40.73              | y = 11.30ln(x) - 28.25                           |
| r                                     | 0.968                              | 0.976                                 | 0.992                               | 0.986                                            |
| GI <sub>50</sub> (μM)                 | 47.12                              | 56.05                                 | 37.53                               | 1013.35                                          |
| Camptothecin (GI <sub>50</sub> ) (μM) | 53.37                              | 64.34                                 | 52.80                               | 74.84                                            |
| F-ratio                               | 186.15*                            | 287.77*                               | 412.29*                             | 231.88*                                          |
| HSD                                   | 6.85                               | 6.16                                  | 5.07                                | 3.07                                             |

Significance level (\* $p \leq 0.05$ ).  
Values expressed as mean ± SE.  
Means with different superscripts alphabets represent significantly different values.

Supplementary Table S4. RT-qPCR primers sequence analysis.

| S. No. | Primer Name [Acession No.] | Product Size | Oligonucleotides (5'-3') sequence                                | Source |
|--------|----------------------------|--------------|------------------------------------------------------------------|--------|
| 1.     | p53 [NM_000546.5]          | 199          | Forward-TCACTGAAGACCCAGGTCCA<br>Reverse -TTGGCTGTCCCAGAATGCAA    | NCBI   |
| 2.     | Bcl-2 [NM_000633.2]        | 123          | Forward-AGTCTGGGAATCGATCTGGA<br>Reverse-GGCAACGATCCCATCAATCT     | NCBI   |
| 3.     | Cyclin E [NM_001238.3]     | 150          | Forward- GGTATCAGTGGTGCGACATAG<br>Reverse- CCAAGCTGTCTCTGTGGGTC  | NCBI   |
| 4.     | CDK2 [NM_001798]           | 180          | Forward- GGCCCTATTCCCTGGAGATTC<br>Reverse- CGTCCATCTTCATCCAGGGG  | NCBI   |
| 5.     | β-actin [T25383]           | 166          | Forward- GTCCTCTCCCAAGTCACACA<br>Reverse- GTCATACATCTCAAGTTGGGAC | NCBI   |
